# Supplementary material
Source: Royal Society of Chemistry journal article supplement (doi:10.1039/d6sm00133e)
Supplement: d6sm00133e1.pdf [file d6sm00133e1.pdf]

Electronic Supplementary Information

**Parallel micro- and mesophase transitions of thermoplastic  
polyurethane induced by thermal annealing**

Yu-Chi Lee, Wei-Cheng Lin, Yi-Quan Zhang, and Chi-Chung Hua\*

*Department of Chemical Engineering, National Chung Cheng University, Chiayi, Taiwan*

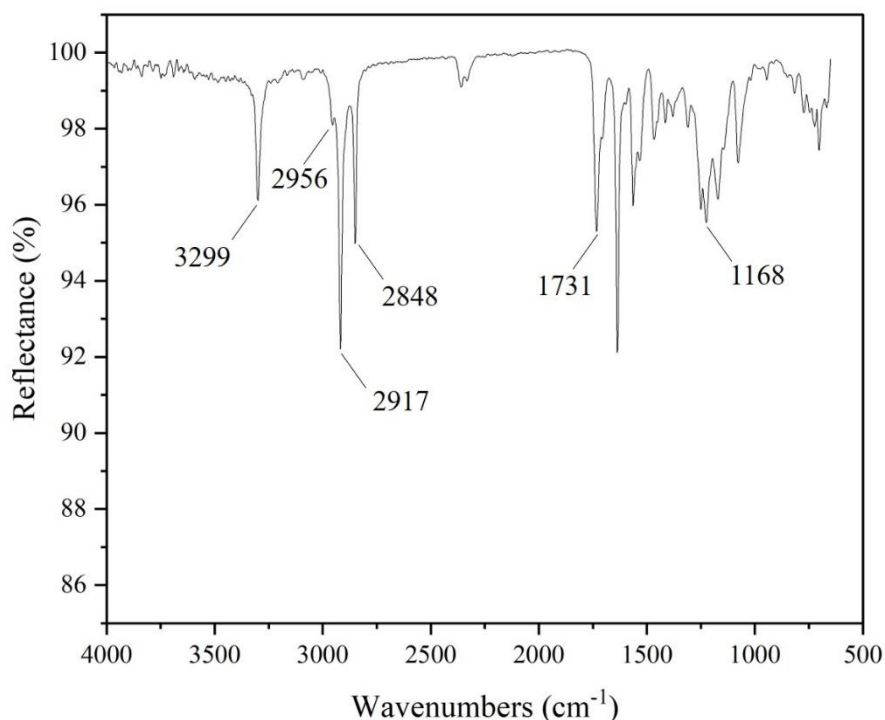

**Fig. S1** FTIR spectra of as-received TPU (Elastollan® C85A10). The data were obtained at room temperature using Fourier transform infrared attenuated total reflection spectroscopy (FTIR-ATR) with a Nicolet iS50 FTIR spectrometer (Thermo Fisher Scientific Corp.) Prior to the measurement, the pristine granule sample was stored in a moisture-proof box at 25 °C. The spectra were collected over the range of 4000–550  $\text{cm}^{-1}$  with 64 scans at a resolution of 2  $\text{cm}^{-1}$ . The absorption peaks at 1731  $\text{cm}^{-1}$  and 1168  $\text{cm}^{-1}$  denote the stretching vibration of the C=O unit and the asymmetric stretching vibration of the C-O unit in the ester components of TPU, respectively. The absorption peak at 3299 is attributed to the N-H stretching vibrations.<sup>1</sup> For the soft segment polyether polyols, the three peaks near 2956  $\text{cm}^{-1}$ , 2917  $\text{cm}^{-1}$ , and 2848  $\text{cm}^{-1}$  are assigned to the asymmetric stretching vibrations of C-H in methyl, in methylene and the symmetric stretching vibrations in methylene,<sup>2</sup> respectively.

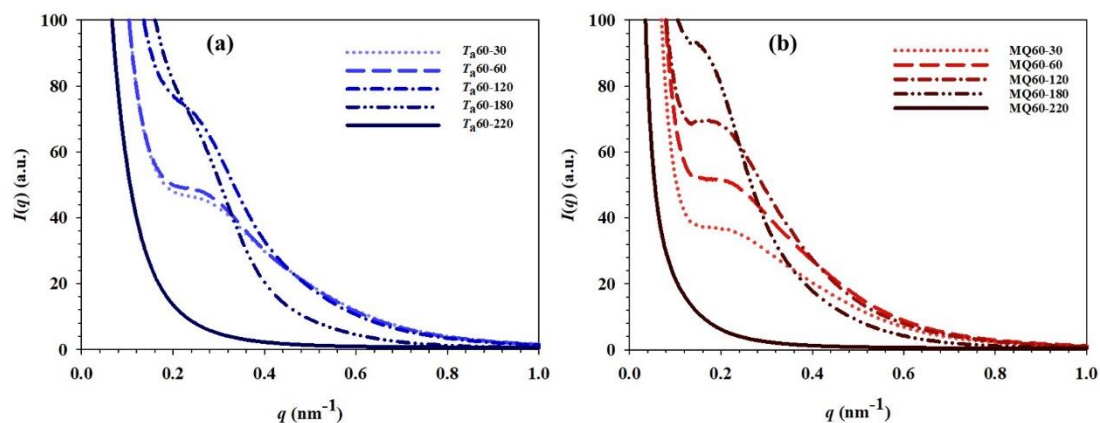

**Fig. S2** Comparison of SAXS intensity profiles during the heating process for (a) pristine and (b) melt-quenched (melting at 220 °C for 15 min and then quickly quenched at -5 °C for 24 h) TPU samples subject to thermal annealing at 60 °C for 24 h, after which each sample was quickly cooled to 30 °C for the subsequent heating and measurement.

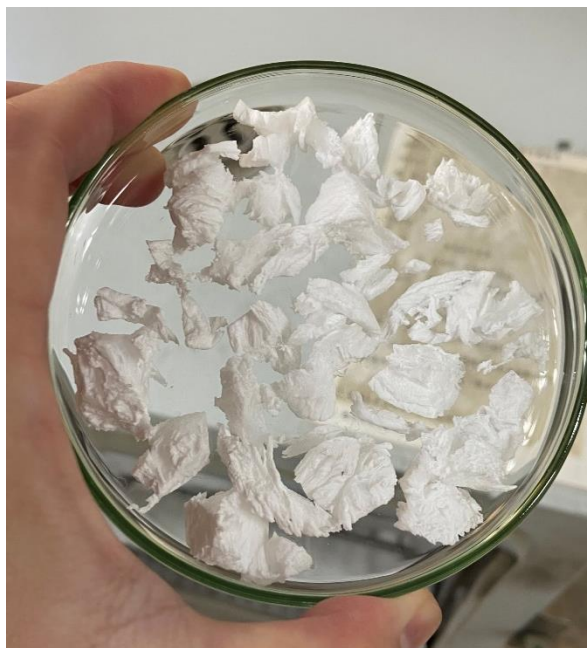

**Fig. S3** Photo of the purified Elastollan® C85A10 sample.

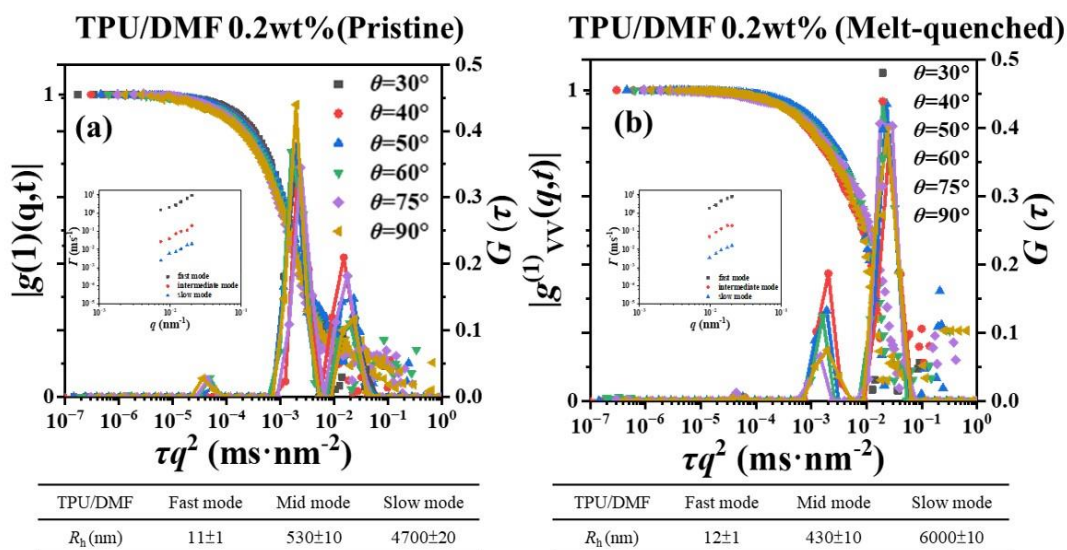

Tanglertpaibul&Rao

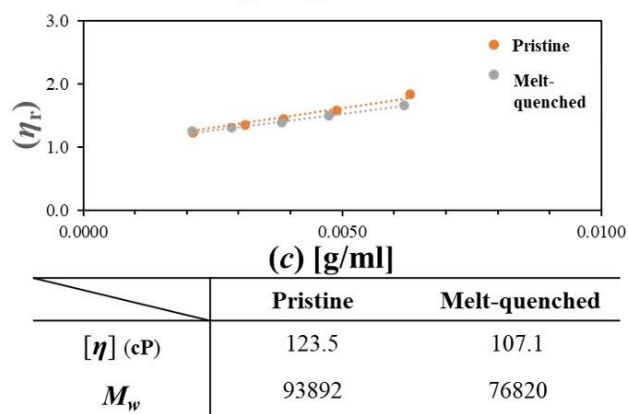

**Fig. S4** DLS results on the 0.2 wt% solutions produced from (a) pristine TPU and (b) melt-quenched TPU dissolved in DMF. (c) Corresponding relative viscosities and polymer molecular weights  $M_w$  determined from the Mark-Houwink equation:<sup>3</sup>  $[\eta] = KM_w^\alpha$ .

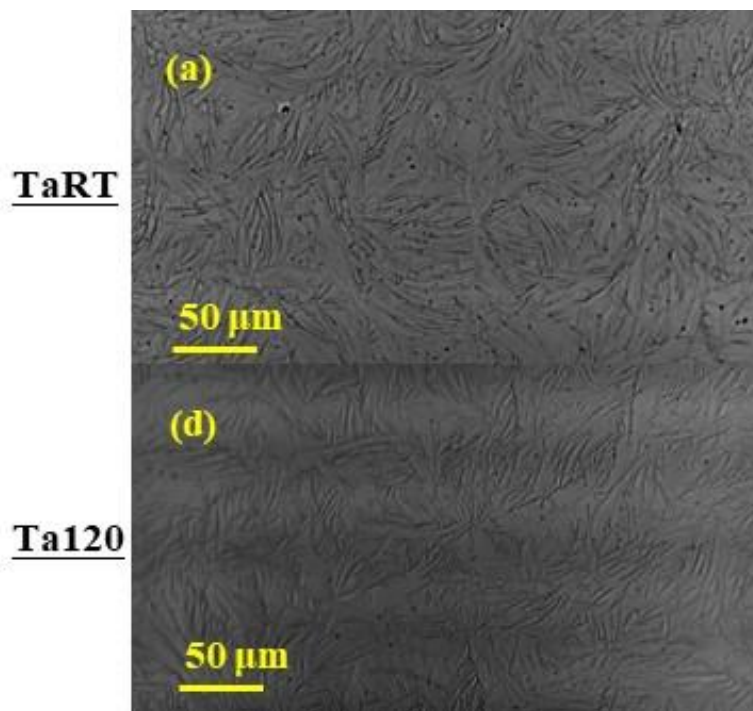

**Fig. S5** OM images of the Pellethane 2363-80A sample shown in Fig. 7 of the main text after contrast enhancement.

## References

- 1 A. Puentes-Parodi, M. Gedan-Smolka, A. Leuteritz, M. Gehde and I. Kuehnert, *J. Compos. Mater.*, 2018, **52**, 3669-3680.
- 2 L. Jiao, H. Xiao, Q. Wang and J. Sun, *Polym. Degrad. Stab.*, 2013, **98**, 2687-2696.
- 3 H. C. Beachell and J. C. Peterson, *J. Polym. Sci., Part A: Polym. Chem.*, 1969, **7**, 2021-2029.
